# Supplementary material for: Research on chemical constituent differences in wild and cultivated Arnebia euchroma by combining UPLC-QTOF-MS with chemometrics
Source: Royal Society of Chemistry journal article supplement (doi:10.1039/d4ay01998a), 2025-01-01
Supplement: d4ay01998a1.pdf [file d4ay01998a1.pdf]

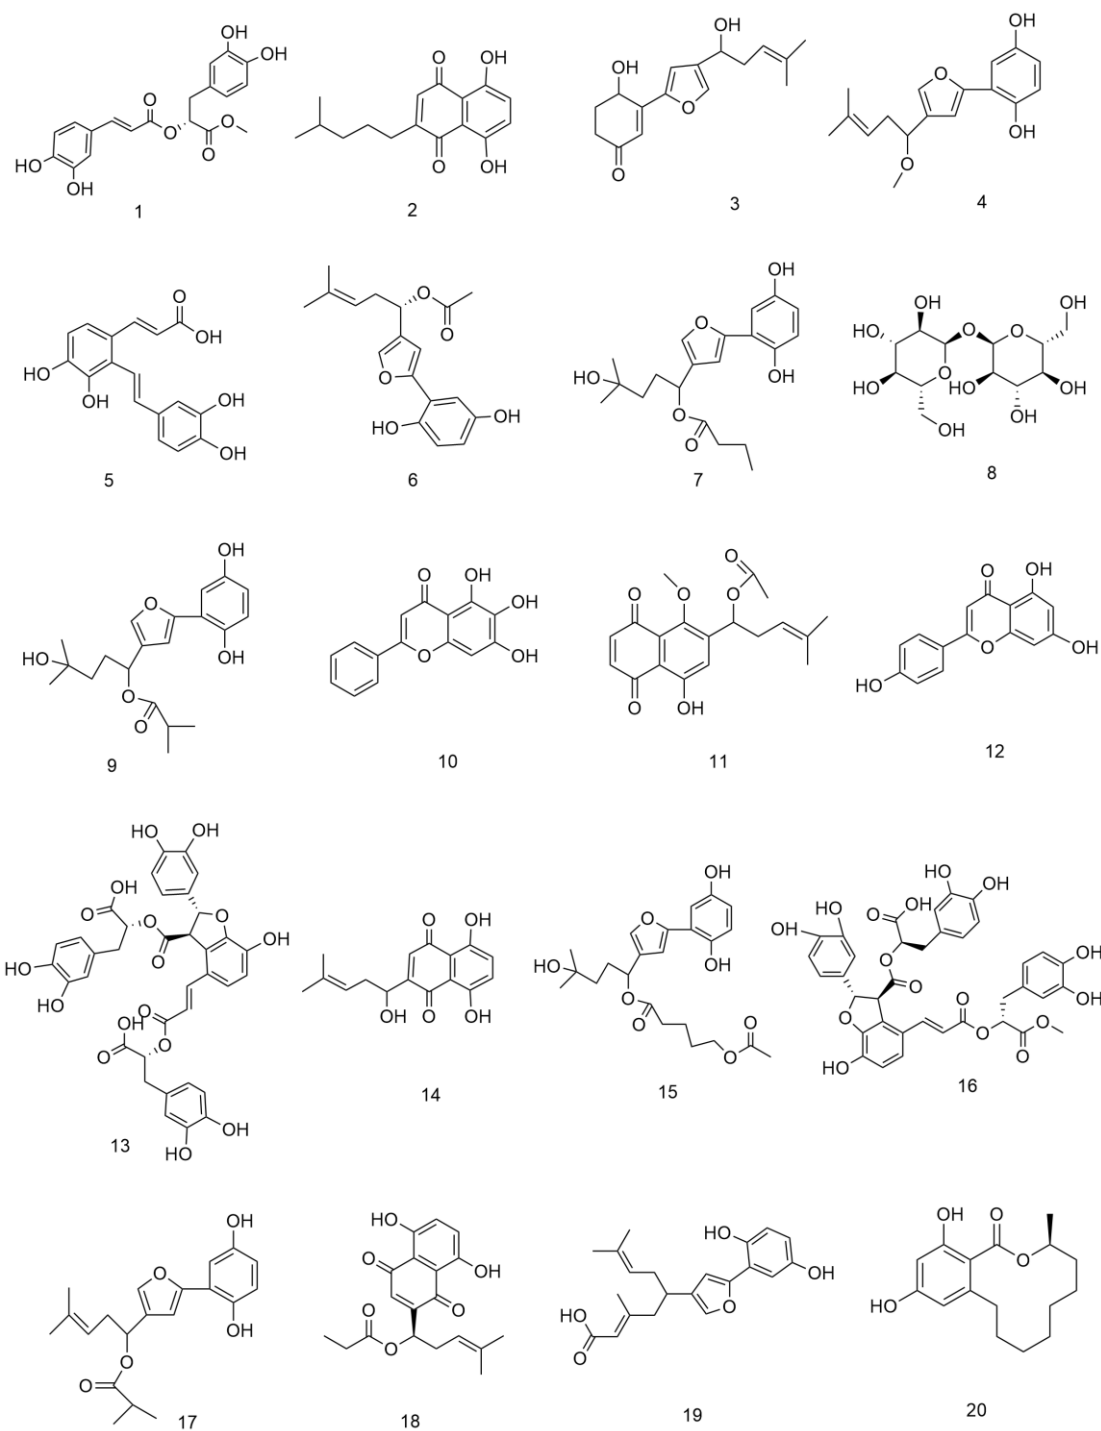

Structures of the identified compounds 1-20

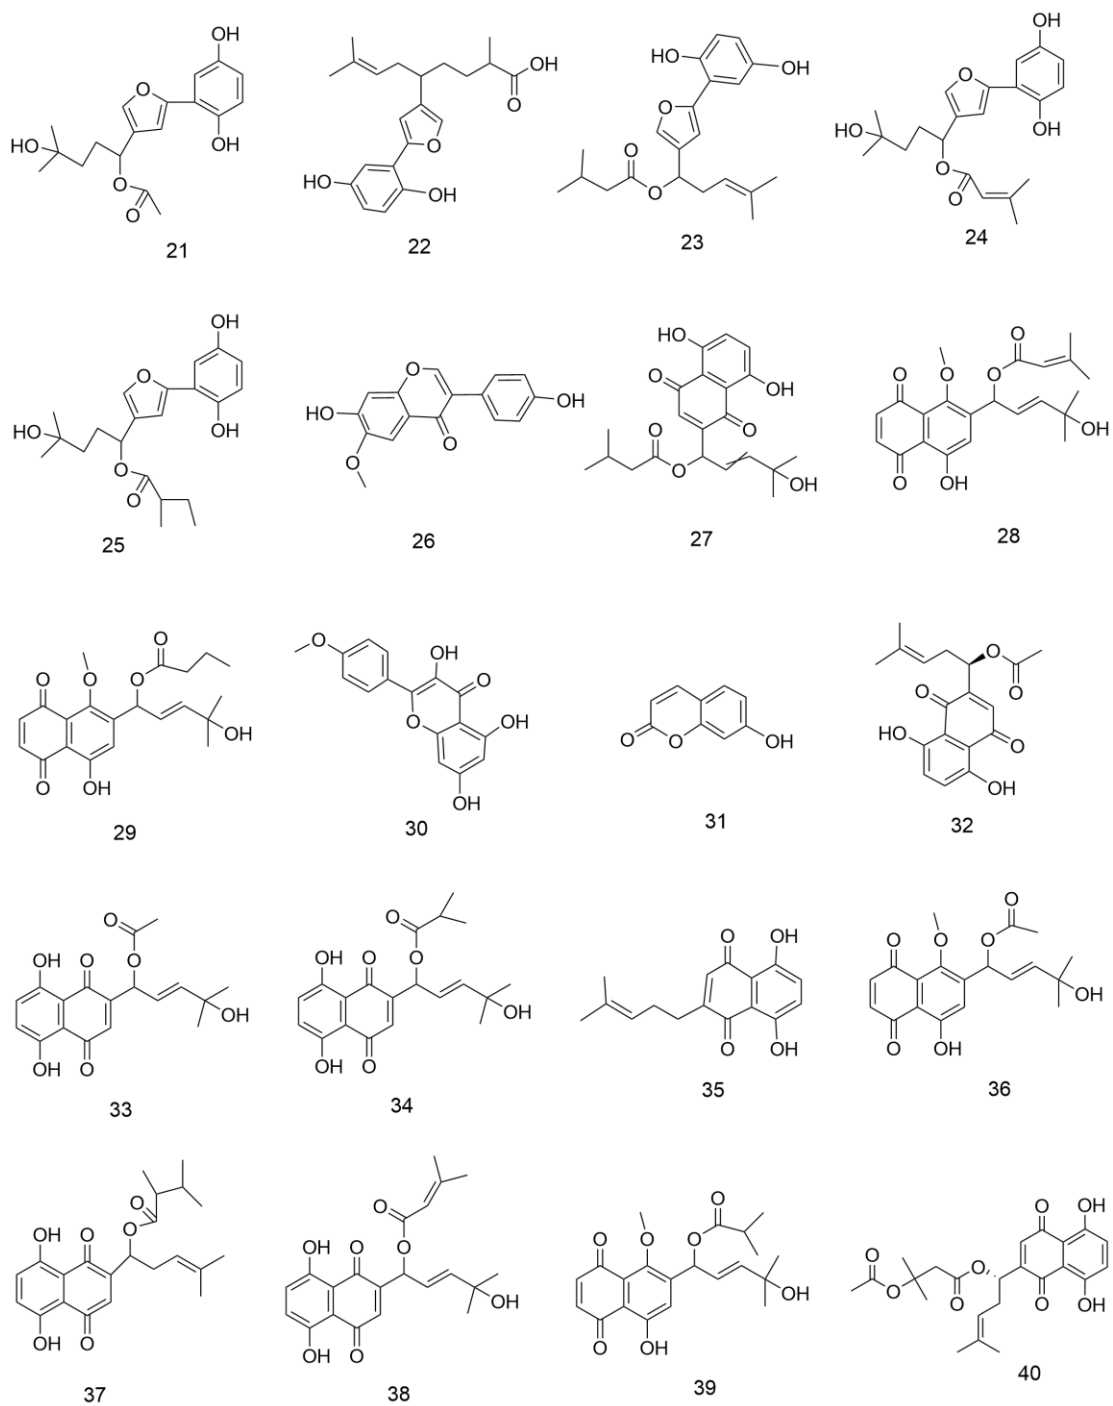

Structures of the identified compounds 21-40

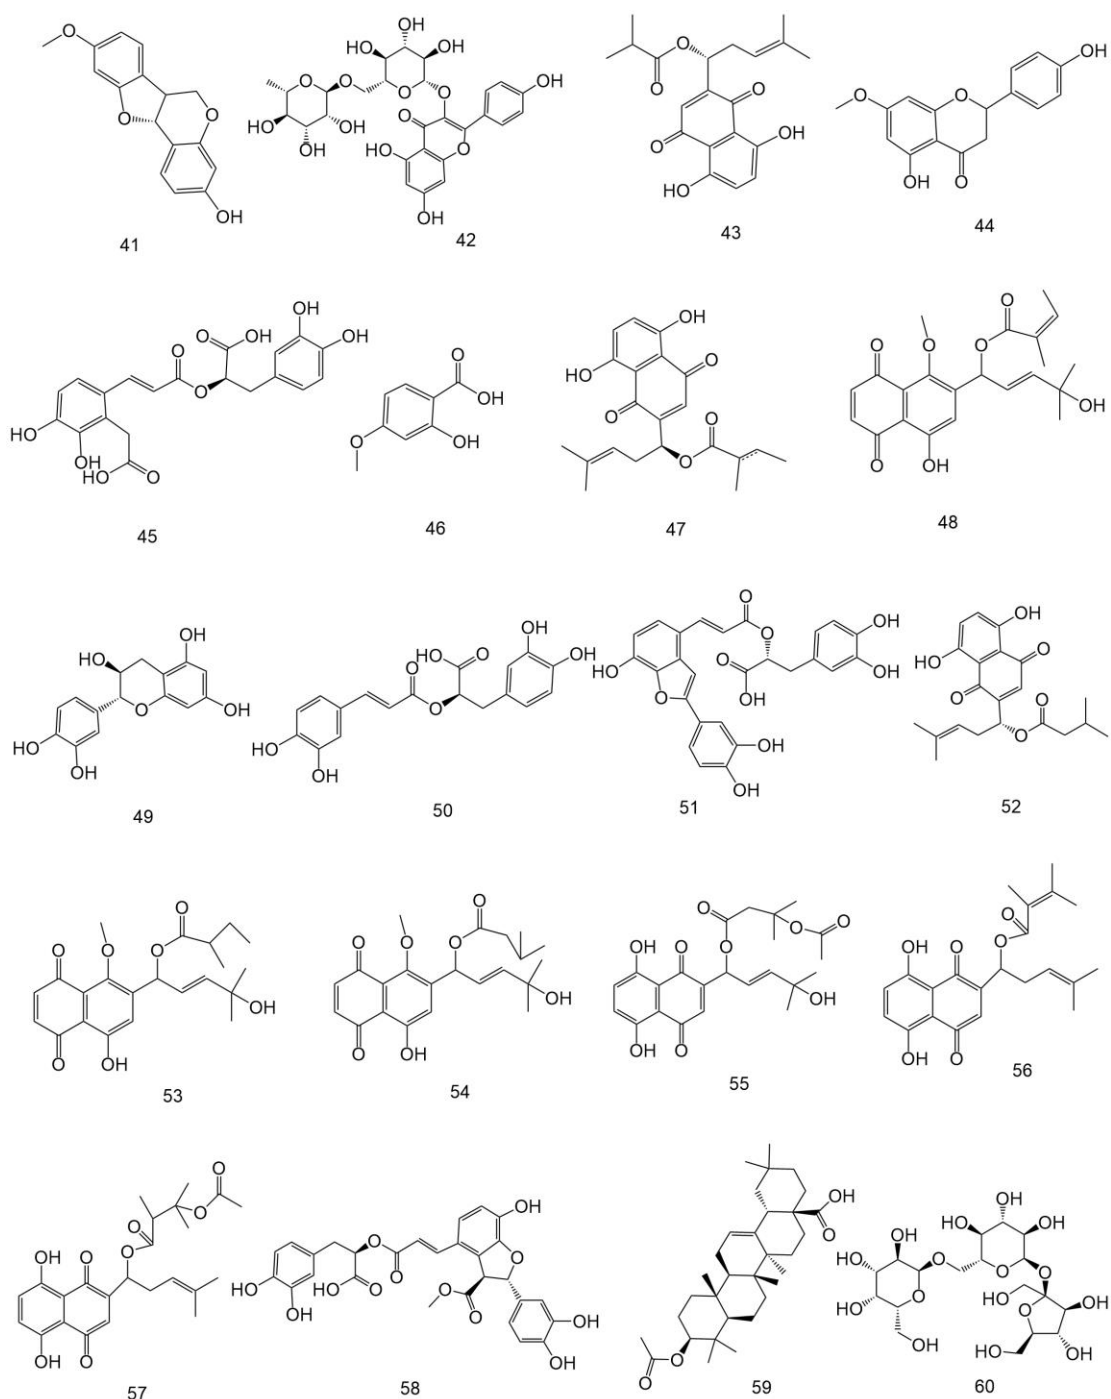

Structures of the identified compounds 41-60

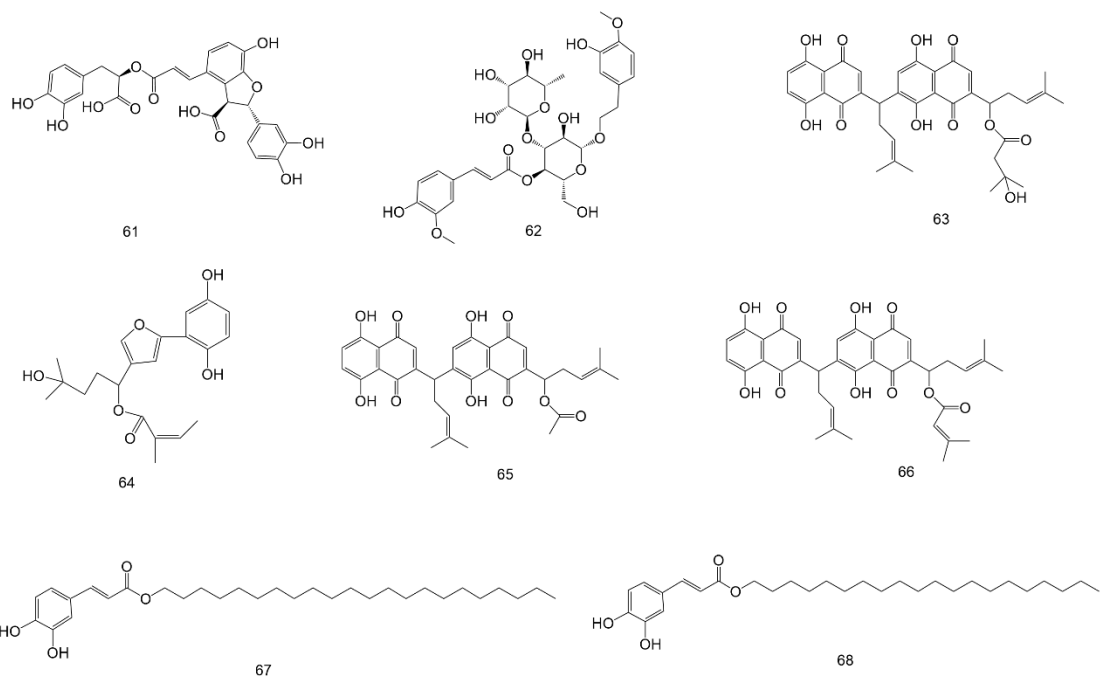

Structures of the identified compounds 61-68
